# Supplementary material for: Midwives’ and Nurses’ Views on the Shift from Hierarchical to Clan Culture in Nigerian Public Healthcare Facilities
Source: Research Square preprint supplement (doi:10.21203/rs.3.rs-7166884/v1), 2025-09-15
Supplement: Supplementary file 1 [file aa6fccf33d16faa20169a359.docx]

**OCAI tool – Section B**

| Dominant characteristics | Now | Preferred |
| --- | --- | --- |
| 1. The organisation is a very personal place. It is like an extended family. People share a lot of themselves. |  |  |
| 1. The organisation is a very dynamic and entrepreneurial place. People are willing to stick their necks out and take risks. |  |  |
| 1. The organisation is very results-oriented. A major concern is with getting the job done. People are very competitive and achievement-oriented. |  |  |
| 1. The organisation is a very controlled and structured place. Formal procedures generally govern what people do. |  |  |
| Total | 100 | 100 |
| Organisational leadership | Now | Preferred |
| 1. The leadership in the organisation is generally considered to exemplify mentoring, facilitating or nurturing. |  |  |
| 1. The leadership in the organisation is generally considered to exemplify entrepreneurship, innovation or risk taking. |  |  |
| 1. The leadership in the organisation is generally considered to exemplify a no-nonsense, aggressive, results-oriented focus. |  |  |
| 1. The leadership in the organisation is generally considered to exemplify coordinating, organising, or smooth-running efficiency. |  |  |
| Total | 100 | 100 |
| Management of employees | Now | Preferred |
| 1. The management style in the organisation is characterised by teamwork, consensus, and participation. |  |  |
| 1. The management style in the organisation is characterised by individual risk taking, innovation, freedom and uniqueness. |  |  |
| 1. The management style in the organisation is characterised by hard-driving competitiveness, high demands and achievements. |  |  |
| 1. The management style in the organisation is characterised by security of employment, conformity, predictability and stability in relationships. |  |  |
| Total | 100 | 100 |
| Organisation glue | Now | Preferred |
| 1. The glue that holds the organisation together is loyalty and mutual trust. Commitment to this organisation runs high. |  |  |
| 1. The glue that holds the organisation together is commitment to innovation and development. There is emphasis of being on the cutting edge. |  |  |
| 1. The glue that holds the organisation together is the emphasis on achievement and goal accomplishment. |  |  |
| 1. The glue that holds the organisation together is formal rules and policies. Maintaining a smooth-running organisation is important. |  |  |
| Total | 100 | 100 |
| Strategic emphases | Now | Preferred |
| 1. The organisation emphasised human development. High trust, openness and participation persist. |  |  |
| 1. The organisation emphasises acquiring new resources and creating new challenges. Trying new things and prospecting for opportunities are valued. |  |  |
| 1. The organisation emphasises competitive actions and achievement. Hitting stretch targets and winning in the marketplace are dominant. |  |  |
| 1. The organisation emphasises permanence and stability. Efficiency, control and smooth operations are important. |  |  |
| Total | 100 | 100 |
| Criteria for success | Now | Preferred |
| 1. The organisation defines success on the basis of the development of human resources, teamwork, employee commitment and concern for people. |  |  |
| 1. The organisation defines success on the basis of having the most unique or newest products. It is a product leader and innovator. |  |  |
| 1. The organisation defines success on the basis of winning in the marketplace and outpacing the competition. Competitive market leadership is key.. |  |  |
| 1. The organisation defines success on the basis of efficiency. Dependable delivery, smooth scheduling and low-cost production are critical. |  |  |
| Total | 100 | 100 |
